# Supplementary material for: Extreme genome diversity in the hyper-prevalent parasitic eukaryote Blastocystis
Source: PLoS Biol. 2017 Sep 11;15(9):e2003769. doi: 10.1371/journal.pbio.2003769 (PMC5608401; doi:10.1371/journal.pbio.2003769)
Supplement: S2 Data — (XLSX) [file pbio.2003769.s023.xlsx]

## Sheet: ST1_ST7_all
Classification of Proteases - Blastocystis STs 1,4 and7 Yellow cells indicate no gene models found for that family						Merops clan	ST1	ST4	ST7
Merops family	numberST1	numberST7	numberST4			Aspartic	7	5	6
A01	4	3	5			Cysteine	101	91	82
A08	1	0	0			Metallo	81	54	80
A22A	2	3	4			Serine	34	28	23
A28A	0	0	1			Threonine	18	15	18
C01A	30	22	20			Unknown	2	0	1
C02A	1	1	1				243	193	210
C12	1	1	1
C13	16	11	11
C19	29	31	33
C26	3	3	4
C44	2	2	1
C45	0	0	1
C48	2	1	3
C50	1	1	1
C56	13	5	4
C65	0	0	1
C78	2	1	1
C85	1	2	2
C87	0	1	1
C95	0	0	3
C97	0	0	3
M01	2	1	2
M03A	2	3	2
M12B	0	1	0
M14	1	2	2
M16	5	6	10
M17	1	1	1
M18	2	3	2
M20C	5	4	4
M22	2	3	0
M23B	29	29	0
M24	9	8	10
M28X	1	2	2
M38	7	6	5
M41	5	5	5
M48	4	2	4
M49	1	1	1
M67	5	3	4
S01B	0	1	0
S08A	8	7	4
S09	8	6	9
S12	1	0	0
S16	2	2	3
S26	3	2	2
S33	4	2	4
S54	4	1	3
S59	4	2	3
T01A	15	17	14
T02	0	1	1
T03	3	0	0
U32	1	0	0
U48	1	1	0
Total	243	210	198
