# Supplementary material for: Extreme genome diversity in the hyper-prevalent parasitic eukaryote Blastocystis
Source: PLoS Biol. 2017 Sep 11;15(9):e2003769. doi: 10.1371/journal.pbio.2003769 (PMC5608401; doi:10.1371/journal.pbio.2003769)
Supplement: S7 Data — (XLSX) [file pbio.2003769.s028.xlsx]

## Sheet: cazome
Carbohydrate Active Enzymes - Blastocystis ST1
Blastocystis ST1
Gene	Family	Curation	Metabolic Pathway	Annotation	Notes
AV274_1715	GH33		sialic acid (coat)	exo-a-sialidases	ok
AV274_5945	GH18	bad model stop missing	chitin (coat)	candidate b-glycosidase distantly related to chitin bindings protein
scaffold67:73900-75774	GH18	bad model stop missing	chitin (coat)	candidate chitinase
AV274_2680	GT2	bad model stop missing	chitin (coat)	candidate chitin synthase
AV274_4258	GH29		fucose (coat)	candidate a-fucosidase
AV274_3427	GH95		fucose (coat)	candidate a-fucosidase	ok, in small scaffold but surrounded by eukaryotic genes
AV274_5463	GT4		cholesterol membrane	candidate NDP-sugar a-glycosyltransferase related to cholesterol a-glucosyltransferase
AV274_1395	GT4		cholesterol membrane	candidate NDP-sugar a-glycosyltransferase related to cholesterol a-glucosyltransferase
AV274_5582	GT4	fragment	cholesterol membrane	candidate NDP-sugar a-glycosyltransferase related to cholesterol a-glucosyltransferase
AV274_5607	GT4	fragment	cholesterol membrane	candidate NDP-sugar a-glycosyltransferase related to cholesterol a-glucosyltransferase
AV274_4010	GT20		non reducing disaccharides (trehalose)	candidate a,a-trehalose-6-phosphate synthase
AV274_5939	GT20		non reducing disaccharides (trehalose)	candidate a,a-trehalose-6-phosphate synthase
AV274_5725	GH13		glycogen	candidate Branching Enzyme
AV274_5426	GH13		glycogen	candidate Indirect Debranching Enzyme
AV274_0018	GT5		glycogen	candidate Glycogen Synthase
AV274_4885	GT35		glycogen	candidate Glycogen Phosphorylase
AV274_1058	GT35		glycogen	candidate Glycogen Phosphorylase
AV274_1585	CBM48		glycogen	Carbohydrate-Binding Module Family 48
AV274_3789	GH13		a-glucans	candidate a-glycosidase
AV274_3462	GH13		a-glucans	candidate a-glycosidase
AV274_2557	GH13		a-glucans	candidate a-glycosidase
AV274_5966	GH13	bad model long c-term	a-glucans	candidate a-glycosidase
AV274_1004	GH3			candidate b-xylosidase
AV274_5385	GH27			candidate a-galactosidase
AV274_5495	GH27			candidate a-galactosidase
AV274_5669	GH35	bad model long c-term		candidate b-galactosidase
AV274_5732	GH35	fragment n-term		candidate b-galactosidase
AV274_0835	GH35	bad model long n-term		candidate b-galactosidase
AV274_4447	GH35	fragment c-term		candidate b-galactosidase
AV274_2904	GH125			candidate a-mannosidase
AV274_4674	GT2			candidate family 2 glycosyltransferase
AV274_3479	GT2			candidate family 2 glycosyltransferase
AV274_6281	GT4			candidate family 4 glycosyltransferase
AV274_0028	GT4			candidate family 4 glycosyltransferase
AV274_5479	GT4	bad model non stop		candidate family 4 glycosyltransferase	ok, surrounded by blasto specific genes on both sides
AV274_5302	GT4			candidate NDP-sugar a-glycosyltransferase
AV274_2452	GT4			candidate NDP-sugar a-glycosyltransferase
AV274_1079	GT8			candidate family 8 glycosyltransferase
AV274_0203	GT8			candidate family 8 glycosyltransferase
AV274_5537	GT31	bad model non stop		candidate NDP-sugar b-glycosyltransferase
AV274_2838	GT31	bad model non stop		candidate NDP-sugar b-glycosyltransferase	ok, surrounded by blasto specific genes on both sides
AV274_1187	GT31	bad model non stop		candidate NDP-sugar b-glycosyltransferase
AV274_1296	GT31			candidate NDP-sugar b-glycosyltransferase
AV274_2364	GT31	bad model non stop		candidate NDP-sugar b-glycosyltransferase
AV274_2891	GT31	fragment		candidate NDP-sugar b-glycosyltransferase	ok, surrounded by blasto specific genes on both sides
AV274_3907	GT31	bad model non stop		candidate NDP-sugar b-glycosyltransferase	HGT	ok, surrounded by blasto specific genes on both sides
AV274_6447	GT61	bad model non stop		candidate family 61 glycosyltransferase
AV274_1375	GT61	fragment		candidate family 61 glycosyltransferase
AV274_0225	GT61			candidate family 61 glycosyltransferase
scaffold7:117447-118747	GT77	bad model non stop		candidate family 77 glycosyltransferase
AV274_1926	GT77	bad model non stop		candidate family 77 glycosyltransferase
AV274_4127	GT77			candidate family 77 glycosyltransferase
AV274_4804	GT77	bad model non stop		candidate family 77 glycosyltransferase
AV274_5418	GT77	bad model non stop		candidate family 77 glycosyltransferase
AV274_5879	GT77	bad model non stop		candidate family 77 glycosyltransferase
AV274_5932	GT77	bad model non stop		candidate family 77 glycosyltransferase	ok, surrounded by blasto specific genes on both sides
AV274_6240	GT77			candidate family 77 glycosyltransferase
AV274_3835	PL9			candidate polysaccharide lyase distantly related to pectate lyases
AV274_0116	CE9	bad prediction		N-acetylglucosamine-6-phosphate deacetylase
AV274_2420	CE9			N-acetylglucosamine-6-phosphate deacetylase
AV274_4874	CBM32			Carbohydrate-Binding Module Family 32
AV274_5488	CBM32			Carbohydrate-Binding Module Family 32
AV274_1420	CBM32			Carbohydrate-Binding Module Family 32
AV274_4677	CBM32			Carbohydrate-Binding Module Family 32
AV274_3098	CBM32			Carbohydrate-Binding Module Family 32
AV274_5708	CBM32			Carbohydrate-Binding Module Family 32
AV274_2730	CBM32			Carbohydrate-Binding Module Family 32
AV274_3837	CBM32			Carbohydrate-Binding Module Family 32
AV274_3090	CBM32			Carbohydrate-Binding Module Family 32
AV274_1288	CBM32			Carbohydrate-Binding Module Family 32
n-glycans synthesis
AV274_2231	GT1	fragment	ER pathway	UDP-N-acetylglucosamine transferase (Alg13)
AV274_2432	GT1	fragment	ER pathway	UDP-N-acetylglucosamine transferase (Alg14)
AV274_1485	GT33		ER pathway	chitobiosyldiphosphodolichol β-mannosyltransferase (Alg1)
AV274_6582	GT33		ER pathway	chitobiosyldiphosphodolichol β-mannosyltransferase (Alg1)
AV274_2129	GT4		ER pathway	α-1,3-mannosyltransferase (Alg2)
AV274_5257	GT4		ER pathway	Phosphatidylinositol N-acetylglucosaminyltransferase (DPM2)
AV274_0764	GT58		ER pathway	Dolichol pyrophosphate-mannose α-1,3-mannosyltransferase (Alg3)
AV274_2580	GT22		ER pathway	Dol-P-Man α-mannosyltransferase (Alg9)
AV274_1408	GT22		ER pathway	Dol-P-Man α-mannosyltransferase (Alg9/Alg12)
AV274_6346	GT22		ER pathway	Dol-P-Man α-mannosyltransferase (Alg9/Alg12)
AV274_2482	GT57		ER pathway	Dol-P-Glc α-1,3-glucosyltransferase (Alg6)
AV274_3080	GT57		ER pathway	Dol-P-Glc α-1,3-glucosyltransferase (Alg8)
AV274_6276	GT2	bad model long n-term	ER pathway	Dolichyl-phosphate mannosyltransferase (DPM1)
AV274_3361	GT2	fragment	ER pathway	Dolichyl-phosphate mannosyltransferase (DPM1)
AV274_5286	GT59		ER pathway	Glc2Man9GlcNAc2-PP-Dol α-1,2-glucosyltransferase (Alg10)
AV274_1982	GT66		ER pathway	protein β-oligosaccharyltransferase (STT)
AV274_5849	GT24		ER pathway	glycoprotein a-glucosyltransferase (UGGT)
AV274_0007	GH47	fragment	ER/GA pathway	α-mannosidase (MAN1)
AV274_1337	GH47	fragment	ER/GA pathway	α-mannosidase (MAN1)
AV274_3198	GH47		ER/GA pathway	α-mannosidase (MAN1)
AV274_3445	GH47		ER/GA pathway	α-mannosidase (MAN1)
AV274_6103	GH47		ER/GA pathway	α-mannosidase (MAN1)
AV274_0417	GH47		ER/GA pathway	α-mannosidase (MAN1)
AV274_0515	GH47		ER/GA pathway	α-mannosidase (MAN1)
AV274_0959	GH47	fragment	ER/GA pathway	α-mannosidase (MAN1)
AV274_0745	GH63		ER pathway	α-glucosidase (GCS1)
AV274_1248	GH31	bad model long n-term	ER pathway	α-glucosidase (GANAB)
AV274_0963	GH38			α-mannosidase (MAN2)
AV274_4548	GH38	fragment c-term		α-mannosidase (MAN2)
AV274_4952	GH38	bad model		α-mannosidase (MAN2)	ok in a blasto specific scaffold
AV274_4275	GH38			α-mannosidase (MAN2)
AV274_3477	GT13	fragment		α-1,3-mannosyl-glycoprotein β-1,2-N-acetylglucosaminyltransferase (MGAT1)
AV274_3814	GT13			α-1,3-mannosyl-glycoprotein β-1,2-N-acetylglucosaminyltransferase (MGAT1)
AV274_4902	GT13			α-1,3-mannosyl-glycoprotein β-1,2-N-acetylglucosaminyltransferase (MGAT1)
AV274_6208	GT13			α-1,3-mannosyl-glycoprotein β-1,2-N-acetylglucosaminyltransferase (MGAT1)
AV274_6237	GT13			α-1,3-mannosyl-glycoprotein β-1,2-N-acetylglucosaminyltransferase (MGAT1)
AV274_1640	GT27			polypeptide α-N-acetylgalactosaminyltransferase
AV274_6229	GT27	fragment		polypeptide α-N-acetylgalactosaminyltransferase
AV274_2800	GT27			polypeptide α-N-acetylgalactosaminyltransferase
AV274_3827	GT27	fragment		polypeptide α-N-acetylgalactosaminyltransferase
AV274_1452	GT27	fragment		polypeptide α-N-acetylgalactosaminyltransferase
AV274_6190	GT31			candidate NDP-sugar b-glycosyltransferase distantly related to N-acetyllactosaminide β-1,3-N-acetylglucosaminyltransferase
AV274_2151	GT31			candidate NDP-sugar b-glycosyltransferase related to UDP-Gal: glycoprotein-N-acetylgalactosamine b-1,3-galactosyltransferase
AV274_0295	GT41	bad model non stop		candidate UDP-GlcNAc: protein O-b-N-acetylglucosaminyltransferase
AV274_1782	GT41	fragment		candidate UDP-GlcNAc: protein O-b-N-acetylglucosaminyltransferase
AV274_2318	GT49			candidate β-1,3-N-acetylglucosaminyltransferase distantly related
AV274_5526	GT49			candidate β-1,3-N-acetylglucosaminyltransferase distantly related
AV274_5535	GT49			candidate β-1,3-N-acetylglucosaminyltransferase distantly related
AV274_0889	GT49			candidate β-1,3-N-acetylglucosaminyltransferase distantly related
AV274_1547	GT49			candidate β-1,3-N-acetylglucosaminyltransferase distantly related
AV274_1700	GT49			candidate β-1,3-N-acetylglucosaminyltransferase distantly related
AV274_1879	GT49			candidate β-1,3-N-acetylglucosaminyltransferase distantly related
AV274_2126	GT49			candidate β-1,3-N-acetylglucosaminyltransferase distantly related
AV274_3177	GT49	fragment		candidate β-1,3-N-acetylglucosaminyltransferase distantly related
AV274_3596	GT49			candidate β-1,3-N-acetylglucosaminyltransferase distantly related
AV274_3659	GT49			candidate β-1,3-N-acetylglucosaminyltransferase distantly related
AV274_4002	GT49			candidate β-1,3-N-acetylglucosaminyltransferase distantly related
AV274_4563	GT49			candidate β-1,3-N-acetylglucosaminyltransferase distantly related
AV274_4795	GT49			candidate β-1,3-N-acetylglucosaminyltransferase distantly related
AV274_4877	GT49			candidate β-1,3-N-acetylglucosaminyltransferase distantly related
AV274_5076	GT49			candidate β-1,3-N-acetylglucosaminyltransferase distantly related
AV274_5168	GT49			candidate β-1,3-N-acetylglucosaminyltransferase distantly related
AV274_5228	GT49			candidate β-1,3-N-acetylglucosaminyltransferase distantly related
AV274_5378	GT49			candidate β-1,3-N-acetylglucosaminyltransferase distantly related
AV274_5578	GT49			candidate β-1,3-N-acetylglucosaminyltransferase distantly related
AV274_5640	GT49			candidate β-1,3-N-acetylglucosaminyltransferase distantly related
AV274_6040	GT49			candidate β-1,3-N-acetylglucosaminyltransferase distantly related
AV274_6319	GT49			candidate β-1,3-N-acetylglucosaminyltransferase distantly related
AV274_6598	GT49			candidate β-1,3-N-acetylglucosaminyltransferase distantly related
AV274_0130	GT49			candidate β-1,3-N-acetylglucosaminyltransferase distantly related
AV274_0261	GT49			candidate β-1,3-N-acetylglucosaminyltransferase distantly related
AV274_0406	GT49			candidate β-1,3-N-acetylglucosaminyltransferase distantly related
AV274_0483	GT49			candidate β-1,3-N-acetylglucosaminyltransferase distantly related
AV274_1232	GT49			candidate β-1,3-N-acetylglucosaminyltransferase distantly related
AV274_1785	GT49			candidate β-1,3-N-acetylglucosaminyltransferase distantly related
AV274_1959	GT49			candidate β-1,3-N-acetylglucosaminyltransferase distantly related
AV274_2020	GT49	fragment		candidate β-1,3-N-acetylglucosaminyltransferase distantly related
AV274_2232	GT49			candidate β-1,3-N-acetylglucosaminyltransferase distantly related
AV274_2254	GT49			candidate β-1,3-N-acetylglucosaminyltransferase distantly related
AV274_2414	GT49			candidate β-1,3-N-acetylglucosaminyltransferase distantly related
AV274_2600	GT49	fragment		candidate β-1,3-N-acetylglucosaminyltransferase distantly related
AV274_3107	GT49			candidate β-1,3-N-acetylglucosaminyltransferase distantly related
AV274_3173	GT49			candidate β-1,3-N-acetylglucosaminyltransferase distantly related
AV274_4177	GT49	fragment		candidate β-1,3-N-acetylglucosaminyltransferase
AV274_2098	GT49			candidate β-1,3-N-acetylglucosaminyltransferase
AV274_3318	GT49			candidate β-1,3-N-acetylglucosaminyltransferase
AV274_3515	GT49			candidate β-1,3-N-acetylglucosaminyltransferase
AV274_3791	GT49			candidate β-1,3-N-acetylglucosaminyltransferase
AV274_4237	GT49			candidate β-1,3-N-acetylglucosaminyltransferase
AV274_4350	GT49	fragment		candidate β-1,3-N-acetylglucosaminyltransferase
AV274_5999	GT49	fragment		candidate β-1,3-N-acetylglucosaminyltransferase
AV274_6418	GT49			candidate β-1,3-N-acetylglucosaminyltransferase
AV274_0744	GT49			candidate β-1,3-N-acetylglucosaminyltransferase
AV274_1031	GT49	fragment		candidate β-1,3-N-acetylglucosaminyltransferase
AV274_2391	GT49	fragment		candidate β-1,3-N-acetylglucosaminyltransferase
AV274_2427	GT49			candidate β-1,3-N-acetylglucosaminyltransferase
AV274_2627	GT49	fragment		candidate β-1,3-N-acetylglucosaminyltransferase
AV274_2903	GT49	fragment		candidate β-1,3-N-acetylglucosaminyltransferase
AV274_2989	GT49	fragment		candidate β-1,3-N-acetylglucosaminyltransferase
AV274_3220	GT49			candidate β-1,3-N-acetylglucosaminyltransferase
AV274_3701	GT49			candidate β-1,3-N-acetylglucosaminyltransferase
AV274_4547	GT49	fragment		candidate β-1,3-N-acetylglucosaminyltransferase
AV274_4020	GT50	bad model non stop		candidate Dol-P-Man α-1,4-mannosyltransferase
Candidate genes possibly involved in the degradation of N-glycanes in Blastocystis sp. NandII
AV274_3518	GH2			b-mannosidase (MANBA)	ok surrounded by blasto
AV274_2948	GH20	bad model long c-term		b-N-acetylhexosaminidase
AV274_5110	GH20	bad model long c-term		b-N-acetylhexosaminidase
AV274_0086	GH20	bad model long c-term		b-N-acetylhexosaminidase
AV274_2179	GH27			a-N-acetylgalactosaminidase
AV274_2762	GH27			a-N-acetylgalactosaminidase
AV274_0673	GH85			endo-b-N-acetylglucosaminidase
AV274_0131	GH89	fragment		α-N-acetylglucosaminidases
AV274_0605	GH89	fragment		α-N-acetylglucosaminidases
AV274_3771	GH89			α-N-acetylglucosaminidases
AV274_5298	GH99	bad model long n-term		a-glycosidase related to glycoprotein endo-a-1,2-mannosidase
