# Supplementary material for: Extreme genome diversity in the hyper-prevalent parasitic eukaryote Blastocystis
Source: PLoS Biol. 2017 Sep 11;15(9):e2003769. doi: 10.1371/journal.pbio.2003769 (PMC5608401; doi:10.1371/journal.pbio.2003769)
Supplement: S10 Data — (XLSX) [file pbio.2003769.s031.xlsx]

## Sheet: Sheet1
Calcium associated proteins - Blastocystis ST1. Green cells with X indicate gene present, while yellow cells with - indicate gene not present in Blastocystis ST1 but present in other	stramenopiles
			Blastocystis ST1	Other stramenopiles
Intracellular CBP with EF-hand domain		Parvalbumin	-	-
		Calmodulin	x	x
		S100 proteins	-	-
		Calcineurin	-	x
intracellular CBP lacking the EF-hand domain		calreticulin	-	x
		calsequestrin	x	x
		annexins	-	x
		protein kinase C (PKC)	-	-
		sinaptotagmin
extracelular CBP	EF-hand domains	Osteonectin	-	-
	EGF-like domains	Coagulation factors VII, IX and X	-	-
		protein C and protein S	-	-
		Fibrillin	-	-
		Notch and delta receptors	-	-
		LDL receptors	-	-
	g-carboxyl glutamic acid (GLA)-rich domains	factors II -prothrombin- VII, IX, X,
		protein C, protein S,	-	-
		protein Z	-	-
		osteocalcin	-	-
		matrix GLA protein	-	-
		periostin	-	x
		growth arrest-specific protein 6	-	-
	cadherin domains	cadherins/protocadherins	x	x
		flamingo	-	-
	Ca 2+ - dependent (C)-type lectin-like domains	C-type lectins	-	-
		selectins	-	-
		the mannose receptor family	-	-
		the dendritic cell-specifi c ICAM-3 grabbing non-integrin molecule	x	x
		mannose-binding protein	-	-
		collectins	-	-
	Ca 2+ -binding pockets of family C G-protein-coupled receptors	Ca 2+ -sensing receptor (CaR)	-	-
		metabotropic glutamate receptors (mGluRs)	-	-
		GABA B receptors	-	x
